# Supplementary material for: Bioaccessibility, gut microbial metabolism and intestinal transport of phenolics from 100% Concord grape juice and whole grapes are similar in a simulated digestion and fecal fermentation model
Source: Royal Society of Chemistry journal article supplement (doi:10.1039/d1fo04226b), 2022-01-01
Supplement: d1fo04226b1.pdf [file d1fo04226b1.pdf]

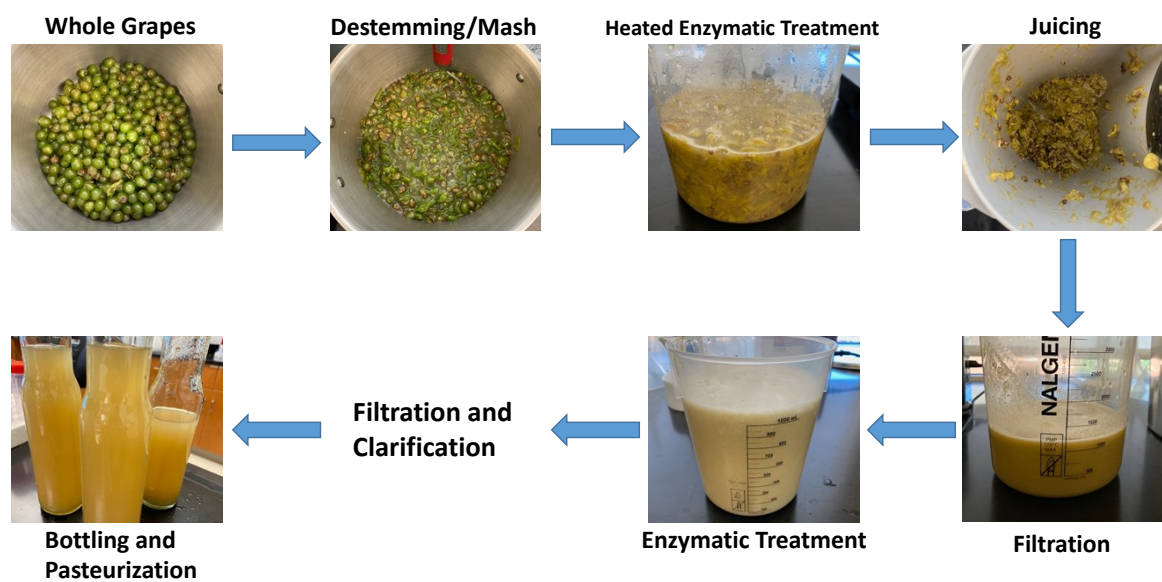

**Supplemental Figure 1.** Bench-top emulsion of commercial 100% grape juice processing.

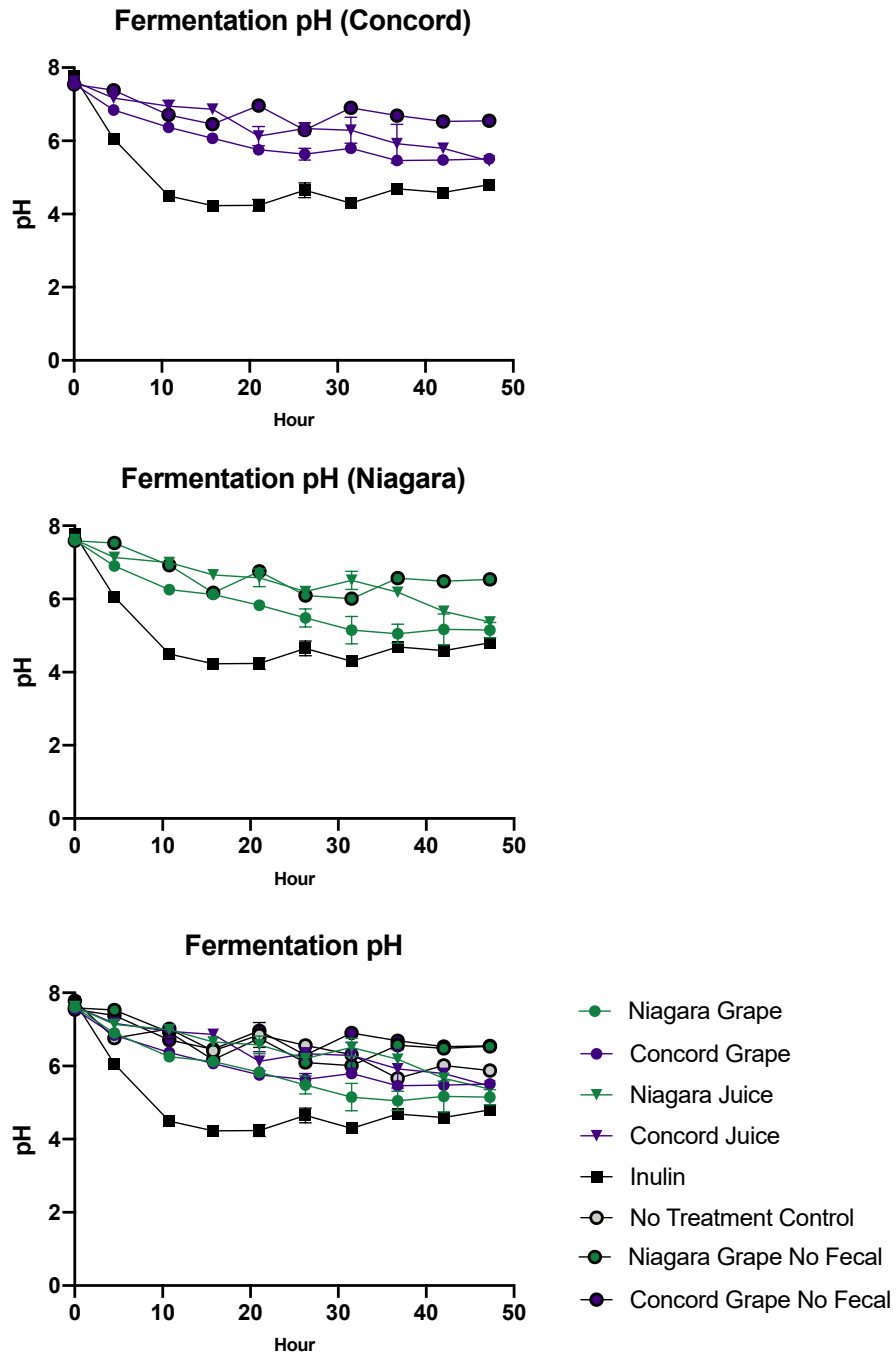

**Supplemental Figure 2.** pH (mean  $\pm$  SD) of anaerobic microbial fermentation of Concord and Niagara grapes, 100% grape juices, and relevant controls over 48 hours.

**Supplemental Table 1.** SIR and MRM transitions for identification and quantification of phenolic compounds and metabolites.

| Compound                             | MW (g/mol) | Detection Mode | [M-H] <sup>-</sup> (m/z) | [M+H] <sup>+</sup> (m/z) | Fragment Ion (m/z) | Cone Voltage (V) | Collision Energy (eV) |
|--------------------------------------|------------|----------------|--------------------------|--------------------------|--------------------|------------------|-----------------------|
| (+)-catechin                         | 290        | (-) ESI        | 289                      | n/a                      | 109                | 33               | 24                    |
| (-)-epicatechin                      | 290        | (-) ESI        | 289                      | n/a                      | 109                | 33               | 24                    |
| (+)-gallo catechin                   | 306        | (-) ESI        | 305                      | n/a                      | 125                | 40               | 20                    |
| (-)-epigallocatechin                 | 306        | (-) ESI        | 305                      | n/a                      | 125                | 40               | 20                    |
| (-)-epicatechin gallate              | 442        | (-) ESI        | 441                      | n/a                      | 169                | 36               | 18                    |
| procyanidin B2                       | 579        | (-) ESI        | 578                      | n/a                      | 289                | 25               | 25                    |
| vanillic acid                        | 168        | (-) ESI        | 167                      | n/a                      | 152                | 27               | 12                    |
| coutaric acid                        | 296        | (-) ESI        | 295                      | n/a                      | 163                | 30               | 24                    |
| caftaric acid                        | 312        | (-) ESI        | 311                      | n/a                      | 149                | 22               | 20                    |
| p-coumaric acid                      | 164        | (-) ESI        | 163                      | n/a                      | 119                | 30               | 16                    |
| gallic acid                          | 170        | (-) ESI        | 169                      | n/a                      | 125                | 34               | 16                    |
| caffeic acid                         | 180        | (-) ESI        | 179                      | n/a                      | 135                | 32               | 22                    |
| ferulic acid                         | 194        | (-) ESI        | 193                      | n/a                      | 134                | 28               | 17                    |
| phenylacetic acid                    | 136        | (-) ESI        | 135                      | n/a                      | 91                 | 18               | 6                     |
| 3-hydroxyphenylacetic acid           | 152        | (-) ESI        | 151                      | n/a                      | 136                | 34               | 12                    |
| 4-hydroxybenzoic acid                | 138        | (-) ESI        | 137                      | n/a                      | 93                 | 28               | 12                    |
| 3-hydroxybenzoic acid                | 138        | (-) ESI        | 137                      | n/a                      | 93                 | 30               | 12                    |
| 3,4-dihydroxybenzoic acid            | 154        | (-) ESI        | 153                      | n/a                      | 109                | 28               | 14                    |
| 3-(3-hydroxyphenyl)propionic acid    | 166        | (-) ESI        | 165                      | n/a                      | 147                | 30               | 15                    |
| 3-(3OH-4methoxyphenyl)propionic acid | 196        | (-) ESI        | 195                      | n/a                      | 136                | 32               | 12                    |
| 3-(4-hydroxyphenyl)propionic acid    | 166        | (-) ESI        | 165                      | n/a                      | 121                | 30               | 12                    |
| 4OH-3,5-dimethoxybenzaldehyde        | 182        | (-) ESI        | 181                      | n/a                      | 166                | 24               | 12                    |
| 4-hydroxybenzaldehyde                | 122        | (-) ESI        | 121                      | n/a                      | 92                 | 44               | 24                    |
| hippuric acid                        | 179        | (-) ESI        | 178                      | n/a                      | 77                 | 28               | 16                    |
| quercetin                            | 302        | (-) ESI        | 301                      | n/a                      | 151                | 38               | 20                    |
| myricetin                            | 318        | (-) ESI        | 317                      | n/a                      | 151                | 46               | 26                    |
| kaempferol-3-glucoside               | 448        | (-) ESI        | 447                      | n/a                      | 284                | 42               | 18                    |
| quercetin-3-glucoside                | 464        | (-) ESI        | 463                      | n/a                      | 300                | 42               | 24                    |
| myricetin-3-glucose                  | 480        | (-) ESI        | 479                      | n/a                      | 317                | 42               | 20                    |
| kaempferol-3-rutinoside              | 595        | (-) ESI        | 594                      | n/a                      | 285                | 40               | 18                    |
| quercetin-3-rutinoside               | 610        | (-) ESI        | 609                      | n/a                      | 300                | 42               | 24                    |
| resveratrol                          | 228        | (-) ESI        | 227                      | n/a                      | 185                | 38               | 16                    |
| resveratrol-3-glucoside              | 390        | (-) ESI        | 389                      | n/a                      | 227                | 38               | 20                    |
| cyanidin-3-arabioside                | 419        | (+) ESI        | n/a                      | 419                      | 287                | 46               | 20                    |
| peonidin-3-arabioside                | 433        | (+) ESI        | n/a                      | 433                      | 301                | 35               | 20                    |
| delphinidin-3-arabioside             | 435        | (+) ESI        | n/a                      | 435                      | 303                | 46               | 18                    |
| petunidin-3-arabioside               | 449        | (+) ESI        | n/a                      | 449                      | 317                | 40               | 22                    |
| cyanidin-3-glucoside                 | 449        | (+) ESI        | n/a                      | 449                      | 287                | 46               | 20                    |
| peonidin-3-glucoside                 | 463        | (+) ESI        | n/a                      | 464                      | 301                | 35               | 30                    |
| delphinidin-3-glucoside              | 465        | (+) ESI        | n/a                      | 465                      | 303                | 46               | 20                    |
| petunidin-3-glucoside                | 479        | (+) ESI        | n/a                      | 479                      | 317                | 40               | 22                    |
| malvidin-3-glucoside                 | 493        | (+) ESI        | n/a                      | 493                      | 287                | 46               | 20                    |
| cyanidin-3-galactoside               | 449        | (+) ESI        | n/a                      | 449                      | 287                | 46               | 20                    |
| peonidin-3-galactoside               | 463        | (+) ESI        | n/a                      | 464                      | 301                | 35               | 30                    |
| malvidin-3-galactoside               | 493        | (+) ESI        | n/a                      | 493                      | 287                | 46               | 28                    |
| delphinidin-3-glucuronide            | 466        | (+) ESI        | n/a                      | 465                      | 303                | 46               | 18                    |

|                                          |     |         |     |     |     |    |     |
|------------------------------------------|-----|---------|-----|-----|-----|----|-----|
| 3-(3,4diHP)- $\gamma$ -<br>valerolactone | 208 | (+) ESI | n/a | 209 | 148 | 25 | 20  |
| $\gamma$ -valerolactone                  | 100 | (+) ESI | n/a | 101 | 55  | 18 | 10  |
| Cyanidin (acylated forms)                | n/a | (+) ESI | n/a | 287 | n/a | 25 | n/a |
| Peonidin (acylated forms)                | n/a | (+) ESI | n/a | 301 | n/a | 25 | n/a |
| Petunidin (acylated forms)               | n/a | (+) ESI | n/a | 317 | n/a | 25 |     |
| Delphinidin (acylated<br>forms)          | n/a | (+) ESI | n/a | 303 | n/a | 25 | n/a |
| Malvidin (acylated forms)                | n/a | (+) ESI | n/a | 331 | n/a | 25 | n/a |

\*acylated forms of anthocyanins were determined through single ion responses (SIR) of the parent anthocyanin and were identified as acylated forms due to shifts in retention

**Supplemental Table 2.** Raw material content (mg/100g) of phenolic species in Concord and Niagara grape and 100% juice samples.

| <b>Compound (mg/100g)</b>        | <b>Concord Juice</b> | <b>Concord Grape</b> | <b>Niagara Juice</b> | <b>Niagara Grape</b> |
|----------------------------------|----------------------|----------------------|----------------------|----------------------|
| <b>catechin</b>                  | 0.27 ± 0.02          | 3.91 ± 0.27          | 6.25 ± 0.17          | 16.63 ± 1.18         |
| <b>epicatechin</b>               | 0.45 ± 0.05          | 4.38 ± 0.31          | 10.99 ± 0.44         | 9.62 ± 0.33          |
| <b>galocatechin</b>              | n/d                  | n/d                  | 0.16 ± 0.01          | n/d                  |
| <b>epigallocatechin</b>          | n/d                  | 0.14 ± 0.02          | 0.16 ± 0.02          | 0.20 ± 0.04          |
| <b>epicatechin gallate</b>       | 0.02 ± 0.01          | 0.75 ± 0.11          | 0.96 ± 0.05          | 0.68 ± 0.18          |
| <b>procyanidin B2</b>            | 0.26 ± 0.02          | 0.58 ± 0.09          | 1.04 ± 0.11          | 0.83 ± 0.18          |
| <b>Total Flavan-3-ols</b>        | 1.00 ± 0.10          | 9.75 ± 0.82          | 19.56 ± 0.82         | 27.96 ± 1.91         |
| <b>vanillic acid</b>             | 0.01 ± 0.01          | n/d                  | 0.02 ± 0.01          | n/d                  |
| <b>coutaric acid</b>             | 0.32 ± 0.02          | 0.10 ± 0.01          | 1.09 ± 0.09          | 0.14 ± 0.02          |
| <b>caftaric acid</b>             | 1.70 ± 0.06          | 0.67 ± 0.04          | 5.68 ± 0.29          | 0.64 ± 0.11          |
| <b>p-coumaric acid</b>           | 0.07 ± 0.01          | 0.04 ± 0.01          | 0.09 ± 0.01          | 0.03 ± 0.01          |
| <b>gallic acid</b>               | 0.09 ± 0.01          | 0.06 ± 0.01          | 1.40 ± 0.16          | 0.06 ± 0.01          |
| <b>caffeic acid</b>              | 0.04 ± 0.01          | 0.04 ± 0.01          | 0.22 ± 0.01          | 0.04 ± 0.01          |
| <b>ferulic acid</b>              | 0.03 ± 0.01          | 0.08 ± 0.01          | 0.02 ± 0.01          | 0.03 ± 0.01          |
| <b>Total Phenolic acids</b>      | 2.28 ± 0.09          | 1.03 ± 0.06          | 8.54 ± 0.55          | 0.98 ± 0.14          |
| <b>resveratrol</b>               | 0.01 ± 0.01          | 0.03 ± 0.01          | 0.01 ± 0.01          | 0.03 ± 0.01          |
| <b>resveratrol-3-glucoside</b>   | 0.03 ± 0.01          | 0.04 ± 0.01          | 0.03 ± 0.01          | 0.04 ± 0.01          |
| <b>Total Stilbenes</b>           | 0.04 ± 0.01          | 0.07 ± 0.01          | 0.05 ± 0.01          | 0.07 ± 0.01          |
| <b>quercetin</b>                 | 0.01 ± 0.01          | 0.01 ± 0.01          | 0.02 ± 0.01          | 0.01 ± 0.01          |
| <b>myricetin</b>                 | n/d                  | 0.02 ± 0.01          | n/d                  | n/d                  |
| <b>kaempferol-3-glucoside</b>    | n/d                  | n/d                  | 0.07 ± 0.01          | 0.02 ± 0.01          |
| <b>quercetin-3-glucoside</b>     | 0.66 ± 0.05          | 0.88 ± 0.02          | 0.85 ± 0.03          | 0.63 ± 0.10          |
| <b>myricetin-3-glucoside</b>     | 0.29 ± 0.06          | 0.09 ± 0.01          | n/d                  | n/d                  |
| <b>kaempferol-3-rutinoside</b>   | 2.79 ± 0.26          | 1.93 ± 0.59          | n/d                  | n/d                  |
| <b>quercetin-3-rutinoside</b>    | 1.28 ± 0.14          | 4.56 ± 1.21          | 0.01 ± 0.01          | 0.09 ± 0.03          |
| <b>Total Flavonols</b>           | 5.04 ± 0.51          | 7.50 ± 1.84          | 0.95 ± 0.04          | 0.75 ± 0.13          |
| <b>cyanidin-3-arabinoside</b>    | 0.03 ± 0.01          | 0.12 ± 0.01          | n/d                  | n/d                  |
| <b>peonidin-3-arabinoside</b>    | 0.10 ± 0.01          | 0.42 ± 0.06          | n/d                  | n/d                  |
| <b>delphinidin-3-arabinoside</b> | 0.03 ± 0.01          | 0.13 ± 0.01          | n/d                  | n/d                  |
| <b>petunidin-3-arabinoside</b>   | n/d                  | 0.04 ± 0.01          | n/d                  | n/d                  |
| <b>cyanidin-3-glucoside</b>      | 4.86 ± 0.08          | 16.21 ± 1.73         | n/d                  | n/d                  |
| <b>peonidin-3-glucoside</b>      | 1.07 ± 0.05          | 3.80 ± 0.48          | n/d                  | n/d                  |
| <b>delphinidin-3-glucoside</b>   | 0.16 ± 0.01          | 2.80 ± 0.32          | n/d                  | n/d                  |
| <b>petunidin-3-glucoside</b>     | 0.52 ± 0.02          | 4.05 ± 0.34          | n/d                  | n/d                  |
| <b>malvidin-3-glucoside</b>      | 0.03 ± 0.01          | 0.10 ± 0.01          | n/d                  | n/d                  |
| <b>cyanidin-3-galactoside</b>    | 0.21 ± 0.02          | 0.15 ± 0.04          | n/d                  | n/d                  |
| <b>peonidin-3-galactoside</b>    | 6.40 ± 0.09          | 4.07 ± 0.78          | n/d                  | n/d                  |
| <b>malvidin-3-galactoside</b>    | 2.21 ± 0.05          | 1.88 ± 0.37          | n/d                  | n/d                  |
| <b>cyanidin (acylated)</b>       | 1.85 ± 0.11          | 13.82 ± 1.03         | n/d                  | n/d                  |

|                                    |              |                |     |     |
|------------------------------------|--------------|----------------|-----|-----|
| <b>peonidin (acylated)</b>         | 6.80 ± 0.23  | 24.28 ± 2.64   | n/d | n/d |
| <b>delphinidin (acylated)</b>      | 2.82 ± 0.13  | 99.72 ± 8.21   | n/d | n/d |
| <b>petunidin (acylated)</b>        | 0.41 ± 0.02  | 4.47 ± 0.28    | n/d | n/d |
| <b>malvidin (acylated)</b>         | 3.93 ± 0.18  | 20.43 ± 3.36   | n/d | n/d |
| <b>Total Anthocyanins (no acy)</b> | 15.61 ± 0.33 | 33.77 ± 4.16   | n/d | n/d |
| <b>Total Anthocyanins (Acy)</b>    | 15.82 ± 0.66 | 162.72 ± 15.52 | n/d | n/d |
| <b>Total Anthocyanins (Total)</b>  | 31.42 ± 0.99 | 196.49 ± 19.68 | n/d | n/d |

\*n/d indicates that the species was not detected

\*Data are expressed as mean ± standard deviation from n=4 independent assessments.

**Supplemental Table 3.** Absolute bioaccessible content (mg/100g) of phenolic species in Concord and Niagara grape and 100% juice samples.

| <b>Compound (mg/100g)</b>       | <b>Concord Juice</b> | <b>Concord Grape</b> | <b>Niagara Juice</b> | <b>Niagara Grape</b> |
|---------------------------------|----------------------|----------------------|----------------------|----------------------|
| <b>catechin</b>                 | 0.16 ± 0.01          | 0.01 ± 0.01          | 5.28 ± 0.20          | 0.03 ± 0.04          |
| <b>epicatechin</b>              | 0.11 ± 0.01          | n/d                  | 4.11 ± 0.14          | 0.01 ± 0.01          |
| <b>galocatechin</b>             | n/d                  | n/d                  | 0.03 ± 0.01          | n/d                  |
| <b>epigallocatechin</b>         | n/d                  | n/d                  | 0.04 ± 0.01          | n/d                  |
| <b>epicatechin gallate</b>      | n/d                  | n/d                  | 0.03 ± 0.01          | n/d                  |
| <b>procyanidin B2</b>           | 0.02 ± 0.01          | n/d                  | 0.18 ± 0.02          | n/d                  |
| <b>Total Flavan-3-ols</b>       | 0.29 ± 0.03          | 0.01 ± 0.01          | 9.67 ± 0.37          | 0.03 ± 0.05          |
| <b>vanillic acid</b>            | 0.02 ± 0.01          | n/d                  | 0.01 ± 0.01          | n/d                  |
| <b>caftaric acid</b>            | n/d                  | 0.03 ± 0.01          | 0.01 ± 0.01          | 0.01 ± 0.01          |
| <b>p-coumaric acid</b>          | 1.37 ± 0.07          | 0.12 ± 0.11          | 0.07 ± 0.01          | n/d                  |
| <b>gallic acid</b>              | 0.03 ± 0.01          | 0.13 ± 0.02          | 0.03 ± 0.01          | 0.10 ± 0.03          |
| <b>caffeic acid</b>             | 0.09 ± 0.01          | 0.19 ± 0.10          | 0.08 ± 0.01          | 0.01 ± 0.01          |
| <b>ferulic acid</b>             | 0.02 ± 0.01          | 0.10 ± 0.02          | 0.01 ± 0.01          | n/d                  |
| <b>Total Phenolic Acids</b>     | 1.54 ± 0.09          | 0.56 ± 0.26          | 0.23 ± 0.03          | 0.12 ± 0.05          |
| <b>resveratrol-3-glucoside</b>  | 0.01 ± 0.01          | n/d                  | 0.01 ± 0.01          | n/d                  |
| <b>Total Stilbenes</b>          | 0.01 ± 0.01          | n/d                  | 0.01 ± 0.01          | n/d                  |
| <b>kaempferol-3-glucoside</b>   | n/d                  | n/d                  | 0.01 ± 0.01          | 0.04 ± 0.02          |
| <b>quercetin-3-glucoside</b>    | 0.14 ± 0.01          | 0.10 ± 0.02          | 0.15 ± 0.01          | 0.10 ± 0.03          |
| <b>myricetin-3-glucoside</b>    | 0.06 ± 0.01          | 0.02 ± 0.01          | n/d                  | n/d                  |
| <b>kaempferol-3-rutinoside</b>  | 0.05 ± 0.03          | n/d                  | n/d                  | n/d                  |
| <b>Total Flavonols</b>          | 0.25 ± 0.06          | 0.11 ± 0.03          | 0.17 ± 0.02          | 0.14 ± 0.05          |
| <b>cyanidin-3-arabioside</b>    | 0.01 ± 0.01          | n/d                  | n/d                  | n/d                  |
| <b>peonidin-3-arabioside</b>    | 0.04 ± 0.01          | n/d                  | n/d                  | n/d                  |
| <b>delphinidin-3-arabioside</b> | 0.01 ± 0.01          | 0.03 ± 0.01          | n/d                  | n/d                  |
| <b>cyanidin-3-glucoside</b>     | 2.74 ± 0.12          | 0.02 ± 0.01          | n/d                  | n/d                  |
| <b>peonidin-3-glucoside</b>     | 0.67 ± 0.03          | 0.03 ± 0.01          | n/d                  | n/d                  |
| <b>delphinidin-3-glucoside</b>  | 0.04 ± 0.01          | n/d                  | n/d                  | n/d                  |
| <b>petunidin-3-glucoside</b>    | 0.19 ± 0.01          | n/d                  | n/d                  | n/d                  |
| <b>malvidin-3-glucoside</b>     | 0.01 ± 0.01          | n/d                  | n/d                  | n/d                  |

|                                      |              |             |             |             |
|--------------------------------------|--------------|-------------|-------------|-------------|
| <b>cyanidin-3-galactoside</b>        | 0.15 ± 0.01  | 0.01 ± 0.01 | n/d         | n/d         |
| <b>peonidin-3-galactoside</b>        | 3.65 ± 0.26  | 4.08 ± 0.86 | n/d         | n/d         |
| <b>malvidin-3-galactoside</b>        | 1.23 ± 0.06  | 2.32 ± 0.41 | n/d         | n/d         |
| <b>cyandin (acylated)</b>            | 1.16 ± 0.03  | 0.03 ± 0.02 | n/d         | n/d         |
| <b>peonidin (acylated)</b>           | 4.45 ± 0.19  | 1.36 ± 0.16 | n/d         | n/d         |
| <b>delphinidin (acylated)</b>        | 0.42 ± 0.19  | 0.16 ± 0.06 | n/d         | n/d         |
| <b>petunidin (acylated)</b>          | 0.15 ± 0.01  | 0.01 ± 0.01 | n/d         | n/d         |
| <b>malvidin (acylated)</b>           | 2.80 ± 0.11  | 1.53 ± 0.20 | n/d         | n/d         |
| <b>Total Anthocyanins (no acy)</b>   | 8.73 ± 0.50  | 6.50 ± 1.30 | n/d         | n/d         |
| <b>Total Anthocyanins (Acy)</b>      | 8.98 ± 0.39  | 3.09 ± 0.43 | n/d         | n/d         |
| <b>Total Anthocyanins (Total)</b>    | 17.71 ± 0.88 | 9.59 ± 1.73 | n/d         | n/d         |
| <b>3-hydroxyphenylpropionic acid</b> | 0.06 ± 0.01  | 0.04 ± 0.01 | 0.13 ± 0.02 | 0.05 ± 0.01 |
| <b>4-hydroxyphenylpropionic acid</b> | 0.03 ± 0.01  | 0.01 ± 0.01 | 0.05 ± 0.02 | 0.02 ± 0.01 |
| <b>phenylacetic acid</b>             | 0.02 ± 0.01  | 0.01 ± 0.01 | 0.02 ± 0.01 | 0.01 ± 0.01 |

*\*n/d indicates that the species was not detected*

*\*Data are expressed as mean ± standard deviation from n=4 independent assessments.*

**Supplemental Table 4.** Aqueous Digesta treatment cellular transport (picomol/mL of basolateral media) of phenolic species in Concord and Niagara grape and 100% juice samples.

| Compound (picomol/mL)              | Concord Juice   |                  |                   |                   |                   | Concord Grape   |                  |                   |                  |                  | Niagara Juice    |                   |                   |                  |                   | Niagara Grape   |                  |                  |                   |                   |
|------------------------------------|-----------------|------------------|-------------------|-------------------|-------------------|-----------------|------------------|-------------------|------------------|------------------|------------------|-------------------|-------------------|------------------|-------------------|-----------------|------------------|------------------|-------------------|-------------------|
|                                    | 5 minutes       | 15 minutes       | 30 minutes        | 60 minutes        | 120 minutes       | 5 minutes       | 15 minutes       | 30 minutes        | 60 minutes       | 120 minutes      | 5 minutes        | 15 minutes        | 30 minutes        | 60 minutes       | 120 minutes       | 5 minutes       | 15 minutes       | 30 minutes       | 60 minutes        | 120 minutes       |
| phenylacetic acid                  | 7 ± 8           | 30 ± 35          | 72 ± 20           | 99 ± 53           | 194 ± 44          | 16 ± 6          | 14 ± 9           | 26 ± 8            | 28 ± 11          | 43 ± 7           | 6 ± 8            | 145 ± 14          | 220 ± 12          | 264 ± 11         | 226 ± 7           | 3 ± 5           | 7 ± 9            | 15 ± 7           | 20 ± 16           | 34 ± 15           |
| 3-methoxyphenylacetic acid         | 97 ± 9          | 165 ± 31         | 225 ± 32          | 304 ± 28          | 359 ± 40          | 34 ± 16         | 92 ± 4           | 138 ± 4           | 176 ± 9          | 221 ± 18         | 243 ± 63         | 558 ± 118         | 805 ± 56          | 687 ± 43         | 731 ± 46          | 56 ± 8          | 97 ± 14          | 141 ± 25         | 180 ± 11          | 210 ± 25          |
| 3-hydroxyphenylacetic acid         | 19 ± 6          | 12 ± 4           | 12 ± 2            | 13 ± 6            | 12 ± 4            | 11 ± 4          | 9 ± 1            | 8 ± 1             | 9 ± 3            | 12 ± 5           | 12 ± 6           | 13 ± 3            | 11 ± 2            | 11 ± 1           | 11 ± 2            | 11 ± 7          | 8 ± 2            | 10 ± 4           | 10 ± 4            | 11 ± 4            |
| <b>Total phenylacetic acids</b>    | <b>123 ± 16</b> | <b>207 ± 49</b>  | <b>309 ± 34</b>   | <b>416 ± 71</b>   | <b>565 ± 60</b>   | <b>61 ± 17</b>  | <b>114 ± 11</b>  | <b>172 ± 7</b>    | <b>213 ± 7</b>   | <b>276 ± 22</b>  | <b>261 ± 64</b>  | <b>716 ± 131</b>  | <b>1036 ± 56</b>  | <b>962 ± 45</b>  | <b>969 ± 52</b>   | <b>70 ± 13</b>  | <b>112 ± 22</b>  | <b>165 ± 35</b>  | <b>210 ± 29</b>   | <b>256 ± 42</b>   |
| 4-methoxybenzoic acid              | 2 ± 11          | 4 ± 1            | 4 ± 2             | 6 ± 3             | 11 ± 4            | 5 ± 3           | 11 ± 3           | 9 ± 2             | 16 ± 6           | 15 ± 5           | 90 ± 59          | 116 ± 61          | 311 ± 69          | 459 ± 48         | 677 ± 38          | 3 ± 1           | 6 ± 3            | 9 ± 5            | 16 ± 11           | 17 ± 7            |
| 4-hydroxybenzoic acid              | 142 ± 37        | 399 ± 61         | 442 ± 77          | 458 ± 74          | 549 ± 81          | 145 ± 22        | 223 ± 48         | 253 ± 40          | 320 ± 49         | 345 ± 40         | 131 ± 44         | 201 ± 55          | 258 ± 33          | 330 ± 68         | 433 ± 130         | 99 ± 25         | 139 ± 62         | 189 ± 26         | 237 ± 41          | 287 ± 38          |
| 3-hydroxybenzoic acid              | 17 ± 10         | 36 ± 5           | 55 ± 8            | 68 ± 14           | 110 ± 16          | 17 ± 9          | 39 ± 10          | 59 ± 23           | 81 ± 27          | 87 ± 27          | 21 ± 11          | 48 ± 19           | 67 ± 22           | 115 ± 45         | 133 ± 58          | 28 ± 12         | 44 ± 12          | 69 ± 38          | 44 ± 25           | 26 ± 25           |
| dihydroxybenzoic acid              | 245 ± 48        | 411 ± 81         | 804 ± 180         | 840 ± 167         | 972 ± 208         | 187 ± 35        | 396 ± 109        | 551 ± 121         | 515 ± 89         | 493 ± 72         | 597 ± 88         | 890 ± 82          | 917 ± 23          | 1069 ± 75        | 1435 ± 132        | 222 ± 85        | 486 ± 165        | 413 ± 116        | 553 ± 118         | 748 ± 144         |
| gallic acid                        | 101 ± 4         | 153 ± 11         | 207 ± 6           | 257 ± 12          | 306 ± 14          | 98 ± 5          | 145 ± 6          | 201 ± 5           | 252 ± 4          | 301 ± 4          | 117 ± 31         | 180 ± 41          | 227 ± 38          | 287 ± 38         | 346 ± 42          | 96 ± 11         | 146 ± 6          | 198 ± 15         | 250 ± 14          | 298 ± 14          |
| <b>Total benzoic acids</b>         | <b>507 ± 44</b> | <b>1002 ± 93</b> | <b>1512 ± 205</b> | <b>1628 ± 171</b> | <b>1947 ± 247</b> | <b>453 ± 28</b> | <b>815 ± 155</b> | <b>1075 ± 149</b> | <b>1186 ± 92</b> | <b>1244 ± 87</b> | <b>956 ± 103</b> | <b>1436 ± 120</b> | <b>1781 ± 104</b> | <b>2262 ± 92</b> | <b>3025 ± 268</b> | <b>447 ± 72</b> | <b>822 ± 121</b> | <b>878 ± 101</b> | <b>1144 ± 161</b> | <b>1442 ± 172</b> |
| 4-hydroxyphenylpropionic acid      | 25 ± 11         | 48 ± 12          | 83 ± 8            | 112 ± 24          | 138 ± 16          | 15 ± 4          | 31 ± 8           | 53 ± 11           | 67 ± 15          | 82 ± 10          | 26 ± 6           | 55 ± 13           | 75 ± 8            | 92 ± 7           | 112 ± 4           | 16 ± 7          | 25 ± 8           | 42 ± 7           | 54 ± 9            | 65 ± 10           |
| 3-hydroxyphenylpropionic acid      | 77 ± 11         | 146 ± 14         | 238 ± 27          | 308 ± 43          | 360 ± 65          | 32 ± 6          | 60 ± 13          | 125 ± 26          | 186 ± 19         | 224 ± 35         | 122 ± 31         | 211 ± 69          | 262 ± 26          | 375 ± 67         | 500 ± 38          | 60 ± 7          | 88 ± 21          | 151 ± 13         | 138 ± 25          | 149 ± 19          |
| <b>Total Phenylpropionic acids</b> | <b>102 ± 20</b> | <b>193 ± 25</b>  | <b>321 ± 33</b>   | <b>420 ± 48</b>   | <b>498 ± 62</b>   | <b>48 ± 10</b>  | <b>91 ± 10</b>   | <b>178 ± 36</b>   | <b>253 ± 30</b>  | <b>306 ± 44</b>  | <b>148 ± 33</b>  | <b>267 ± 79</b>   | <b>337 ± 33</b>   | <b>468 ± 65</b>  | <b>612 ± 39</b>   | <b>76 ± 14</b>  | <b>113 ± 28</b>  | <b>193 ± 14</b>  | <b>193 ± 30</b>   | <b>214 ± 27</b>   |
| 4-hydroxybenzaldehyde              | 34 ± 8          | 41 ± 9           | 43 ± 12           | 60 ± 5            | 59 ± 4            | 9 ± 3           | 19 ± 7           | 19 ± 5            | 22 ± 5           | 26 ± 4           | 12 ± 2           | 28 ± 9            | 26 ± 9            | 39 ± 11          | 41 ± 5            | 7 ± 1           | 10 ± 6           | 13 ± 4           | 29 ± 18           | 31 ± 12           |
| 3-hydroxy-4-methoxybenzaldehyde    | 1 ± 1           | 2 ± 1            | 2 ± 1             | 3 ± 1             | 4 ± 2             | 1 ± 1           | 4 ± 1            | 3 ± 2             | 6 ± 3            | 7 ± 2            | 5 ± 2            | 6 ± 1             | 7 ± 3             | 13 ± 6           | 19 ± 5            | 3 ± 2           | 3 ± 1            | 4 ± 3            | 7 ± 3             | 7 ± 2             |
| <b>Total benzaldehydes</b>         | <b>35 ± 8</b>   | <b>43 ± 9</b>    | <b>45 ± 12</b>    | <b>63 ± 5</b>     | <b>63 ± 3</b>     | <b>10 ± 2</b>   | <b>23 ± 8</b>    | <b>22 ± 6</b>     | <b>28 ± 3</b>    | <b>33 ± 4</b>    | <b>17 ± 3</b>    | <b>33 ± 9</b>     | <b>33 ± 7</b>     | <b>52 ± 11</b>   | <b>59 ± 5</b>     | <b>9 ± 3</b>    | <b>13 ± 5</b>    | <b>17 ± 4</b>    | <b>36 ± 20</b>    | <b>38 ± 13</b>    |
| quercetin-3-glucoside              | 29 ± 18         | 138 ± 25         | 204 ± 24          | 199 ± 14          | 219 ± 13          | 13 ± 10         | 22 ± 13          | 24 ± 7            | 30 ± 9           | 34 ± 9           | 3 ± 1            | 16 ± 4            | 20 ± 3            | 75 ± 34          | 151 ± 14          | 4 ± 2           | 6 ± 2            | 10 ± 3           | 12 ± 2            | 18 ± 4            |
| cyanidin-3-glucoside               | 2 ± 1           | 4 ± 1            | 24 ± 4            | 115 ± 6           | 127 ± 7           | n/d             | n/d              | n/d               | n/d              | n/d              | n/d              | n/d               | n/d               | n/d              | n/d               | n/d             | n/d              | n/d              | n/d               | n/d               |
| peonidin-3-Glucoside               | n/d             | 4 ± 2            | 6 ± 2             | 4 ± 1             | 4 ± 1             | n/d             | n/d              | n/d               | n/d              | n/d              | n/d              | n/d               | n/d               | n/d              | n/d               | n/d             | n/d              | n/d              | n/d               | n/d               |
| delphinidin-3-glucoside            | n/d             | 28 ± 11          | 83 ± 13           | 113 ± 3           | 208 ± 12          | 4 ± 1           | 6 ± 1            | 9 ± 1             | 11 ± 1           | 13 ± 1           | n/d              | n/d               | n/d               | n/d              | n/d               | n/d             | n/d              | n/d              | n/d               | n/d               |
| delphinidin-3-glucuronide          | 2 ± 1           | 4 ± 3            | 3 ± 2             | 6 ± 3             | 6 ± 2             | 6 ± 1           | 8 ± 1            | 11 ± 1            | 13 ± 1           | 15 ± 1           | n/d              | n/d               | n/d               | n/d              | n/d               | n/d             | n/d              | n/d              | n/d               | n/d               |
| petunidin-3-Glucoside              | 2 ± 1           | 18 ± 5           | 53 ± 7            | 63 ± 6            | 61 ± 6            | n/d             | n/d              | n/d               | n/d              | n/d              | n/d              | n/d               | n/d               | n/d              | n/d               | n/d             | n/d              | n/d              | n/d               | n/d               |
| malvidin-3-glucoside               | 4 ± 1           | 34 ± 6           | 315 ± 42          | 413 ± 34          | 398 ± 29          | n/d             | n/d              | n/d               | n/d              | n/d              | n/d              | n/d               | n/d               | n/d              | n/d               | n/d             | n/d              | n/d              | n/d               | n/d               |
| <b>Total anthocyanins</b>          | <b>10 ± 1</b>   | <b>91 ± 17</b>   | <b>483 ± 57</b>   | <b>713 ± 38</b>   | <b>804 ± 25</b>   | <b>11 ± 1</b>   | <b>14 ± 1</b>    | <b>20 ± 2</b>     | <b>24 ± 1</b>    | <b>28 ± 1</b>    | <b>n/d</b>       | <b>n/d</b>        | <b>n/d</b>        | <b>n/d</b>       | <b>n/d</b>        | <b>n/d</b>      | <b>n/d</b>       | <b>n/d</b>       | <b>n/d</b>        | <b>n/d</b>        |

\*n/d indicates that the species was not detected

\*Data are expressed as mean ± standard deviation from n=4 independent assessments.



**Supplemental Table 5.** Content (picomol/mL of fermenta for a 42mL fermentation) of phenolic species over a 48-hour anaerobic microbial fermentation in Concord and Niagara grape and 100% juices and relevant no fecal and no treatment controls.

| Compound (nanomol/ml)     | Concord Juice |             |             |             | Concord Grape |              |              |              | Niagara Grape |              |              |              | Niagara Grape Fecal Free Control |              |              |              | Niagara Grape Treatment Free Control |             |             |             |              |              |              |             |              |              |              |              |             |             |             |             |             |             |             |             |             |             |             |             |
|---------------------------|---------------|-------------|-------------|-------------|---------------|--------------|--------------|--------------|---------------|--------------|--------------|--------------|----------------------------------|--------------|--------------|--------------|--------------------------------------|-------------|-------------|-------------|--------------|--------------|--------------|-------------|--------------|--------------|--------------|--------------|-------------|-------------|-------------|-------------|-------------|-------------|-------------|-------------|-------------|-------------|-------------|-------------|
|                           | 0 Hour        | 6 Hour      | 12 Hour     | 24 Hour     | 48 Hour       | 0 Hour       | 6 Hour       | 12 Hour      | 24 Hour       | 48 Hour      | 0 Hour       | 6 Hour       | 12 Hour                          | 24 Hour      | 48 Hour      | 0 Hour       | 6 Hour                               | 12 Hour     | 24 Hour     | 48 Hour     |              |              |              |             |              |              |              |              |             |             |             |             |             |             |             |             |             |             |             |             |
| catechin                  | 1.29 ± 0.33   | 0.91 ± 0.26 | 0.78 ± 0.23 | 0.51 ± 0.07 | 0.46 ± 0.01   | 16.85 ± 4.23 | 22.94 ± 6.61 | 15.39 ± 2.31 | 13.88 ± 1.77  | 12.42 ± 1.14 | 18.84 ± 6.51 | 14.83 ± 0.59 | 22.81 ± 0.91                     | 11.84 ± 1.95 | 10.25 ± 1.11 | 20.41 ± 2.75 | 17.06 ± 3.22                         | 3.34 ± 0.62 | 1.02 ± 0.24 | 1.72 ± 0.66 | 15.13 ± 2.70 | 15.78 ± 4.33 | 20.49 ± 1.45 | 8.00 ± 1.60 | 11.12 ± 2.31 | 13.91 ± 4.46 | 16.42 ± 5.66 | 16.87 ± 2.39 | 9.34 ± 0.77 | 9.33 ± 3.07 | n/d         |             |             |
| epigallocatechin          | 0.91 ± 0.40   | 0.91 ± 0.26 | 0.52 ± 0.13 | 0.24 ± 0.05 | 0.21 ± 0.07   | 21.08 ± 6.63 | 32.20 ± 3.05 | 15.37 ± 2.47 | 12.24 ± 1.39  | 8.28 ± 1.79  | 13.78 ± 6.75 | 15.62 ± 2.81 | 21.72 ± 2.15                     | 7.40 ± 1.30  | 4.33 ± 0.94  | 16.87 ± 1.00 | 12.79 ± 1.75                         | 5.74 ± 0.53 | 0.62 ± 0.08 | 0.64 ± 0.19 | 5.64 ± 0.64  | 10.54 ± 1.98 | 6.09 ± 1.11  | 1.44 ± 0.66 | 7.90 ± 0.63  | 7.29 ± 1.24  | 10.77 ± 1.63 | 15.08 ± 1.36 | 5.46 ± 0.25 | 4.83 ± 1.11 | n/d         |             |             |
| epigallocatechin gallate  | n/d           | n/d         | 0.21 ± 0.06 | 0.09 ± 0.01 | 0.16 ± 0.04   | 0.80 ± 0.29  | 2.29 ± 0.36  | 1.48 ± 0.18  | 1.53 ± 0.45   | 1.81 ± 0.23  | 0.51 ± 0.19  | 0.50 ± 0.04  | 1.00 ± 0.11                      | 0.99 ± 0.17  | 2.20 ± 0.24  | 0.10 ± 0.05  | 0.11 ± 0.03                          | 0.13 ± 0.07 | 0.13 ± 0.07 | 0.17 ± 0.09 | 0.11 ± 0.03  | 2.18 ± 0.28  | 1.16 ± 0.15  | 3.35 ± 0.45 | 4.54 ± 0.40  | 0.12 ± 0.04  | 0.13 ± 0.06  | 1.10 ± 0.75  | 0.25 ± 0.07 | 0.56 ± 0.04 | n/d         |             |             |
| procyanidin B2            | 0.23 ± 0.09   | 0.12 ± 0.10 | 0.21 ± 0.16 | n/d         | n/d           | 3.34 ± 0.68  | 7.11 ± 2.30  | 2.78 ± 0.69  | 3.13 ± 0.12   | 1.99 ± 0.31  | 14.15 ± 0.77 | 5.87 ± 0.46  | 6.98 ± 0.34                      | 6.59 ± 0.11  | 9.32 ± 1.20  | 1.25 ± 0.11  | 0.85 ± 0.21                          | 0.34 ± 0.10 | 0.12 ± 0.04 | 0.03 ± 0.01 | 14.71 ± 1.53 | 1.50 ± 0.08  | 4.32 ± 0.36  | 1.57 ± 0.11 | 1.98 ± 0.21  | 6.61 ± 1.79  | 3.14 ± 0.18  | 4.44 ± 0.36  | 3.01 ± 0.50 | 4.79 ± 2.10 | n/d         |             |             |
| p-coumaric acid           | 4.02 ± 0.17   | 7.36 ± 0.41 | 0.27 ± 0.01 | 0.26 ± 0.01 | 0.24 ± 0.01   | 2.24 ± 0.55  | 5.61 ± 0.62  | 0.36 ± 0.01  | 0.29 ± 0.02   | 0.34 ± 0.02  | 0.29 ± 0.01  | 0.39 ± 0.04  | 0.40 ± 0.04                      | 0.34 ± 0.02  | 0.38 ± 0.01  | 0.41 ± 0.06  | 0.80 ± 0.12                          | 0.26 ± 0.01 | 0.24 ± 0.01 | 0.26 ± 0.01 | 3.27 ± 0.01  | 0.50 ± 0.06  | 0.24 ± 0.01  | 0.24 ± 0.01 | 0.25 ± 0.01  | 0.79 ± 0.08  | 0.31 ± 0.02  | 0.40 ± 0.02  | 0.28 ± 0.01 | 0.28 ± 0.01 | 0.28 ± 0.01 | 0.28 ± 0.01 | 0.28 ± 0.01 | 0.28 ± 0.01 | 0.28 ± 0.01 | 0.28 ± 0.01 | 0.28 ± 0.01 | 0.28 ± 0.01 | 0.28 ± 0.01 | 0.28 ± 0.01 |
| gallic acid               | 2.36 ± 0.15   | 2.48 ± 0.22 | 0.27 ± 0.02 | 0.30 ± 0.04 | 0.27 ± 0.01   | 3.94 ± 0.01  | 2.46 ± 0.06  | 0.58 ± 0.04  | 0.46 ± 0.06   | 0.38 ± 0.02  | 1.20 ± 0.04  | 1.56 ± 0.04  | 0.46 ± 0.11                      | 0.39 ± 0.01  | 0.36 ± 0.01  | 0.89 ± 0.09  | 1.24 ± 0.06                          | 0.40 ± 0.02 | 0.34 ± 0.02 | 0.25 ± 0.01 | 1.34 ± 0.26  | 1.66 ± 0.19  | 1.32 ± 0.26  | 0.36 ± 0.01 | 0.62 ± 0.01  | 1.16 ± 0.01  | 1.06 ± 0.02  | 0.41 ± 0.01  | 0.28 ± 0.04 | 0.36 ± 0.01 | 0.37 ± 0.01 | n/d         |             |
| caffeoyl acid             | 0.34 ± 0.03   | 0.60 ± 0.06 | n/d         | n/d         | n/d           | 0.24 ± 0.02  | 0.86 ± 0.09  | 0.24 ± 0.01  | 0.23 ± 0.01   | n/d          | 0.24 ± 0.01  | 0.26 ± 0.01  | 0.26 ± 0.01                      | 0.24 ± 0.01  | n/d          | 0.36 ± 0.06  | 1.47 ± 0.07                          | 0.32 ± 0.03 | 0.26 ± 0.04 | n/d         | n/d          | 0.36 ± 0.03  | 0.24 ± 0.01  | 0.23 ± 0.01 | n/d          | n/d          | 0.24 ± 0.01  | 0.31 ± 0.01  | 0.30 ± 0.06 | 0.23 ± 0.01 | n/d         |             |
| ferulic acid              | 0.41 ± 0.06   | 0.45 ± 0.06 | n/d         | n/d         | n/d           | 0.60 ± 0.11  | 0.87 ± 0.11  | n/d          | 0.23 ± 0.01   | 0.24 ± 0.01  | 0.51 ± 0.08  | 0.41 ± 0.01  | 0.52 ± 0.07                      | n/d          | n/d          | 0.37 ± 0.04  | 0.47 ± 0.06                          | n/d         | 0.21 ± 0.01 | 0.21 ± 0.01 | 0.42 ± 0.02  | 0.74 ± 0.15  | n/d          | 0.24 ± 0.01 | 0.25 ± 0.02  | 0.35 ± 0.01  | 0.31 ± 0.01  | 0.31 ± 0.01  | 0.47 ± 0.06 | n/d         |             |             |
| resveratrol               | n/d           | n/d         | n/d         | n/d         | n/d           | n/d          | n/d          | n/d          | n/d           | n/d          | n/d          | n/d          | n/d                              | n/d          | n/d          | 0.04 ± 0.02  | 0.02 ± 0.02                          | n/d         | n/d         | n/d         | n/d          | n/d          | n/d          | n/d         | n/d          | n/d          | n/d          | n/d          | n/d         | n/d         | n/d         | n/d         | n/d         | n/d         | n/d         | n/d         | n/d         | n/d         |             |             |
| resveratrol 3-β-glucoside | 0.04 ± 0.01   | 0.03 ± 0.01 | 0.02 ± 0.01 | 0.01 ± 0.01 | n/d           | n/d          | n/d          | n/d          | n/d           | n/d          | n/d          | n/d          | n/d                              | n/d          | n/d          | 0.05 ± 0.01  | 0.03 ± 0.01                          | 0.02 ± 0.01 | 0.02 ± 0.01 | n/d         | n/d          | n/d          | n/d          | n/d         | n/d          | n/d          | n/d          | n/d          | n/d         | n/d         | n/d         | n/d         | n/d         | n/d         | n/d         | n/d         | n/d         | n/d         |             |             |
| quercetin                 | 0.67 ± 0.10   | 0.95 ± 0.09 | 1.30 ± 0.26 | 0.85 ± 0.15 | 0.02 ± 0.01   | 0.53 ± 0.17  | 1.05 ± 0.11  | 1.57 ± 0.21  | 0.83 ± 0.16   | 0.62 ± 0.03  | 0.79 ± 0.03  | 0.06 ± 0.03  | 0.43 ± 0.04                      | 0.92 ± 0.03  | 0.62 ± 0.01  | 1.07 ± 0.20  | 2.40 ± 0.35                          | 3.27 ± 0.31 | 2.18 ± 0.23 | 0.02 ± 0.01 | 0.81 ± 0.21  | 4.04 ± 0.90  | 6.70 ± 0.87  | 1.68 ± 0.22 | 0.05 ± 0.02  | 0.67 ± 0.06  | 0.28 ± 0.04  | 1.02 ± 0.02  | 0.99 ± 0.01 | 1.00 ± 0.03 | n/d         |             |             |
| myricetin                 | 0.01 ± 0.01   | 0.05 ± 0.03 | 0.05 ± 0.03 | 0.05 ± 0.03 | 0.01 ± 0.01   | 0.01 ± 0.01  | 0.03 ± 0.01  | 0.05 ± 0.02  | 0.08 ± 0.01   | n/d          | n/d          | n/d          | n/d                              | n/d          | n/d          | n/d          | n/d                                  | n/d         | n/d         | n/d         | n/d          | n/d          | n/d          | n/d         | n/d          | n/d          | n/d          | n/d          | n/d         | n/d         | n/d         | n/d         | n/d         | n/d         | n/d         | n/d         | n/d         | n/d         |             |             |
| quercetin 3-β-glucoside   | 0.58 ± 0.09   | 0.71 ± 0.02 | 0.01 ± 0.01 | n/d         | n/d           | 0.35 ± 0.09  | 0.07 ± 0.02  | 0.01 ± 0.01  | n/d           | n/d          | 0.63 ± 0.21  | 0.59 ± 0.18  | 0.55 ± 0.04                      | 0.56 ± 0.07  | 0.80 ± 0.03  | 0.48 ± 0.05  | 0.14 ± 0.04                          | 0.02 ± 0.01 | n/d         | n/d         | 1.49 ± 0.32  | 0.40 ± 0.05  | 0.09 ± 0.03  | n/d         | n/d          | 1.82 ± 0.04  | 1.50 ± 0.22  | 1.64 ± 0.04  | 0.96 ± 0.17 | 1.48 ± 0.13 | n/d         |             |             |
| myricetin 3-β-glucoside   | 0.29 ± 0.01   | 0.02 ± 0.01 | 0.01 ± 0.01 | 0.01 ± 0.01 | n/d           | 0.03 ± 0.01  | 0.02 ± 0.01  | 0.01 ± 0.01  | 0.02 ± 0.01   | n/d          | 0.03 ± 0.01  | 0.02 ± 0.01  | n/d                              | n/d          | n/d          | 0.03 ± 0.01  | 0.02 ± 0.01                          | n/d         | n/d         | n/d         | n/d          | n/d          | n/d          | n/d         | n/d          | n/d          | n/d          | n/d          | n/d         | n/d         | n/d         | n/d         | n/d         | n/d         | n/d         | n/d         | n/d         | n/d         |             |             |
| quercetin 3-rutinoside    | 0.09 ± 0.06   | n/d         | n/d         | n/d         | n/d           | 0.88 ± 0.40  | 0.10 ± 0.07  | n/d          | n/d           | n/d          | 0.79 ± 0.46  | 0.72 ± 0.20  | n/d                              | n/d          | n/d          | n/d          | n/d                                  | n/d         | n/d         | n/d         | n/d          | n/d          | n/d          | n/d         | n/d          | n/d          | n/d          | n/d          | n/d         | n/d         | n/d         | n/d         | n/d         | n/d         | n/d         | n/d         | n/d         | n/d         | n/d         |             |
| peonidin 3-arabinoside    | 0.06 ± 0.02   | n/d         | n/d         | n/d         | n/d           | 0.02 ± 0.01  | n/d          | n/d          | n/d           | n/d          | 0.03 ± 0.01  | n/d          | n/d                              | n/d          | n/d          | n/d          | n/d                                  | n/d         | n/d         | n/d         | n/d          | n/d          | n/d          | n/d         | n/d          | n/d          | n/d          | n/d          | n/d         | n/d         | n/d         | n/d         | n/d         | n/d         | n/d         | n/d         | n/d         | n/d         |             |             |
| delphinidin 3-arabinoside | 0.01 ± 0.01   | n/d         | n/d         | n/d         | n/d           | 0.08 ± 0.01  | 0.07 ± 0.01  | 0.07 ± 0.01  | n/d           | n/d          | 0.05 ± 0.01  | n/d          | 0.01 ± 0.01                      | n/d          | n/d          | n/d          | n/d                                  | n/d         | n/d         | n/d         | n/d          | n/d          | n/d          | n/d         | n/d          | n/d          | n/d          | n/d          | n/d         | n/d         | n/d         | n/d         | n/d         | n/d         | n/d         | n/d         | n/d         | n/d         | n/d         |             |
| petunidin 3-arabinoside   | 0.03 ± 0.01   | 0.01 ± 0.01 | 0.01 ± 0.01 | n/d         | n/d           | 0.02 ± 0.01  | 0.01 ± 0.01  | 0.01 ± 0.01  | n/d           | n/d          | 0.01 ± 0.01  | 0.01 ± 0.01  | 0.01 ± 0.01                      | n/d          | n/d          | n/d          | n/d                                  | n/d         | n/d         | n/d         | n/d          | n/d          | n/d          | n/d         | n/d          | n/d          | n/d          | n/d          | n/d         | n/d         | n/d         | n/d         | n/d         | n/d         | n/d         | n/d         | n/d         | n/d         | n/d         |             |
| malvidin 3-arabinoside    | n/d           | 0.01 ± 0.02 | 0.04 ± 0.01 | n/d         | n/d           | 0.01 ± 0.01  | 0.02 ± 0.01  | 0.04 ± 0.01  | n/d           | n/d          | 0.01 ± 0.01  | 0.04 ± 0.01  | n/d                              | n/d          | n/d          | n/d          | n/d                                  | n/d         | n/d         | n/d         | n/d          | n/d          | n/d          | n/d         | n/d          | n/d          | n/d          | n/d          | n/d         | n/d         | n/d         | n/d         | n/d         | n/d         | n/d         | n/d         | n/d         | n/d         | n/d         |             |
| cyanidin 3-glucoside      | 1.77 ± 0.03   | 1.19 ± 0.21 | 0.05 ± 0.01 | n/d         | n/d           | 0.33 ± 0.13  | 0.39 ± 0.10  | 0.10 ± 0.01  | 0.01 ± 0.01   | n/d          | 0.34 ± 0.03  | 0.58 ± 0.01  | 0.35 ± 0.07                      | 0.21 ± 0.02  | 0.19 ± 0.02  | n/d          | n/d                                  | n/d         | n/d         | n/d         | n/d          | n/d          | n/d          | n/d         | n/d          | n/d          | n/d          | n/d          | n/d         | n/d         | n/d         | n/d         | n/d         | n/d         | n/d         | n/d         | n/d         | n/d         |             |             |
| peonidin 3-glucoside      | 0.23 ± 0.01   | 0.12 ± 0.02 | n/d         | n/d         | n/d           | 0.09 ± 0.06  | 0.02 ± 0.01  | n/d          | n/d           | n/d          | 0.08 ± 0.01  | 0.04 ± 0.01  | 0.08 ± 0.06                      | 0.10 ± 0.11  | 0.03 ± 0.01  | n/d          | n/d                                  | n/d         | n/d         | n/d         | n/d          | n/d          | n/d          | n/d         | n/d          | n/d          | n/d          | n/d          | n/d         | n/d         | n/d         | n/d         | n/d         | n/d         | n/d         | n/d         | n/d         | n/d         |             |             |
| delphinidin 3-glucoside   | 0.05 ± 0.03   | 0.13 ± 0.18 | 0.11 ± 0.06 | n/d         | n/d           | 1.80 ± 0.14  | 1.47 ± 0.12  | 0.73 ± 0.29  | n/d           | n/d          | 1.79 ± 0.13  | 1.15 ± 0.14  | 0.71 ± 0.15                      | 0.24 ± 0.06  | 0.05 ± 0.01  | n/d          | n/d                                  | n/d         | n/d         | n/d         | n/d          | n/d          | n/d          | n/d         | n/d          | n/d          | n/d          | n/d          | n/d         | n/d         | n/d         | n/d         | n/d         | n/d         | n/d         | n/d         | n/d         | n/d         |             |             |
| petunidin 3-glucoside     | 0.18 ± 0.01   | 0.27 ± 0.02 | 0.02 ± 0.01 | n/d         | n/d           | 0.26 ± 0.07  | 0.36 ± 0.13  | 0.18 ± 0.11  | n/d           | n/d          | 0.17 ± 0.03  | 0.19 ± 0.05  | 0.31 ± 0.08                      | 0.16 ± 0.06  | 0.12 ± 0.01  | n/d          | n/d                                  | n/d         | n/d         | n/d         | n/d          | n/d          | n/d          | n/d         | n/d          | n/d          | n/d          | n/d          | n/d         | n/d         | n/d         | n/d         | n/d         | n/d         | n/d         | n/d         | n/d         | n/d         |             |             |
| cyanidin 3-galactoside    | 0.31 ± 0.02   | 0.47 ± 0.06 | 0.04 ± 0.01 | n/d         | n/d           | 0.03 ± 0.01  | 0.01 ± 0.01  | n/d          | n/d           | n/d          | 0.03 ± 0.01  | 0.03 ± 0.01  | 0.09 ± 0.01                      | 0.09 ± 0.01  | 0.08 ± 0.01  | n/d          | n/d                                  | n/d         | n/d         | n/d         | n/d          | n/d          | n/d          | n/d         | n/d          | n/d          | n/d          | n/d          | n/d         | n/d         | n/d         | n/d         | n/d         | n/d         | n/d         | n/d         | n/d         | n/d         |             |             |
| petunidin 3-galactoside   | n/d           | n/d         | 0.01 ± 0.01 | n/d         | n/d           | n/d          | 1.08 ± 0.33  | 0.25 ± 0.10  | n/d           | n/d          | 0.18 ± 0.10  | 0.13 ± 0.04  | 0.09 ± 0.05                      | n/d          | n/d          | n/d          | n/d                                  | n/d         | n/d         | n/d         | n/d          | n/d          | n/d          | n/d         | n/d          | n/d          | n/d          | n/d          | n/d         | n/d         | n/d         | n/d         | n/d         | n/d         | n/d         | n/d         | n/d         | n/d         | n/d         |             |
| delphinidin 3-galactoside | n/d           | n/d         | n/d         | n/d         | n/d           | n/d          | 0.32 ± 0.03  | 0.93 ± 0.13  | 0.63 ± 0.09   | 0.13 ± 0.01  | n/d          | n/d          | n/d                              | n/d          | n/d          | n/d          | n/d                                  | n/d         | n/d         | n/d         | n/d          | n/d          | n/d          | n/d         | n/d          | n/d          | n/d          | n/d          | n/d         | n/d         | n/d         | n/d         | n/d         | n/d         | n/d         | n/d         | n/d         | n/d         |             |             |
| cyanidin (acylated)       | 0.95 ± 0.52   | 0.27 ± 0.13 | n/d         | n/d         | n/d           | 0.61 ± 0.23  | 0.03 ± 0.01  | 0.05 ± 0.02  | n/d           | n/d          | 1.00 ± 0.72  | 0.45 ± 0.12  | 0.26 ± 0.07                      | 0.13 ± 0.02  | 0.12 ± 0.01  | n/d          | n/d                                  | n/d         | n/d         | n/d         | n/d          | n/d          | n/d          | n/d         | n/d          | n/d          | n/d          | n/d          | n/d         | n/d         | n/d         | n/d         | n/d         | n/d         | n/d         | n/d         | n/d         | n/d         |             |             |
| peonidin (acylated)       | 5.77 ± 0.25   | 1.29 ± 0.63 | 0.16 ± 0.04 | n/d         | n/d           | 1.59 ± 0.46  | 0.28 ± 0.03  | 0.14 ± 0.07  | n/d           | n/d          | 3.43 ± 1.33  | 1.69 ± 0.24  | 1.56 ± 0.56                      | 0.24 ± 0.26  | 0.06 ± 0.04  | n/d          | n/d                                  | n/d         | n/d         | n/d         | n/d          | n/d          | n/d          | n/d         | n/d          | n/d          | n/d          | n/d          | n/d         | n/d         | n/d         | n/d         | n/d         | n/d         | n/d         | n/d         | n/d         | n/d         |             |             |
| delphinidin (acylated)    | 1.19 ± 0.78   |             |             |             |               |              |              |              |               |              |              |              |                                  |              |              |              |                                      |             |             |             |              |              |              |             |              |              |              |              |             |             |             |             |             |             |             |             |             |             |             |             |
